# Supplementary material for: Leucyl-tRNA Synthetase Inhibitor, D-Norvaline, in Combination with Oxacillin, Is Effective against Methicillin-Resistant Staphylococcus aureus
Source: MDPI journal article supplement (doi:10.3390/antibiotics11050683), 2022-05-18
Supplement: s1 [file s1]

## Supplementary data

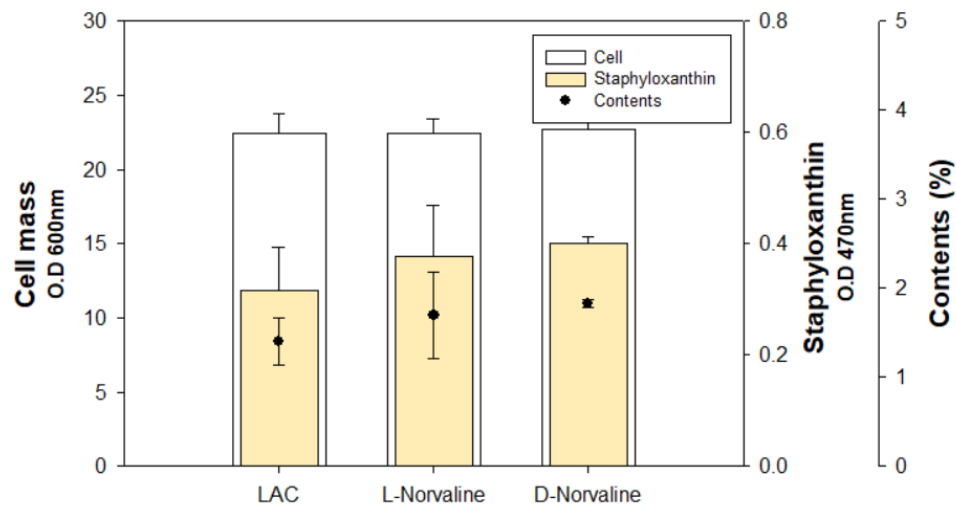

**Supplementary Figure S1.** Staphyloxanthin production in LAC and L- / D- Norvaline treated LAC.

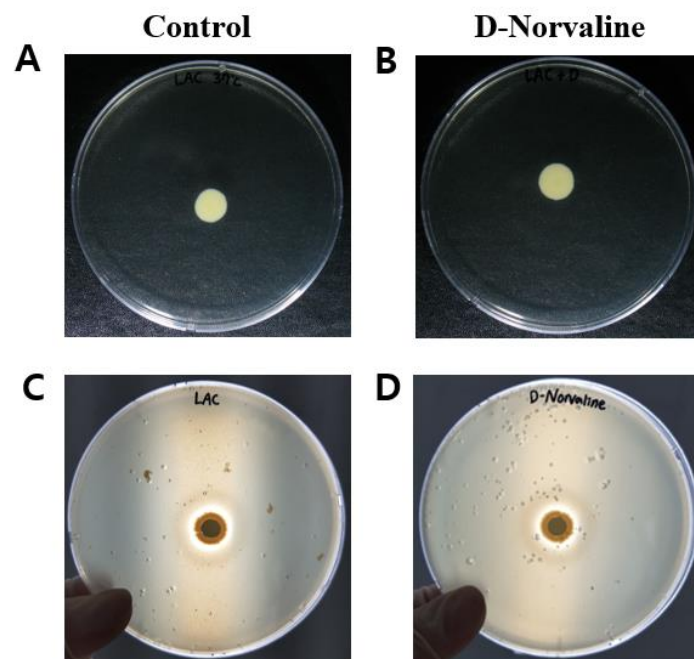

**Supplementary Figure S2.** Plate-based assay. (A) Motility of LAC. (B) Motility of LAC with D-Norvaline. (C) Protease activity in LAC. (D) Protease activity in LAC with D-Norvaline.

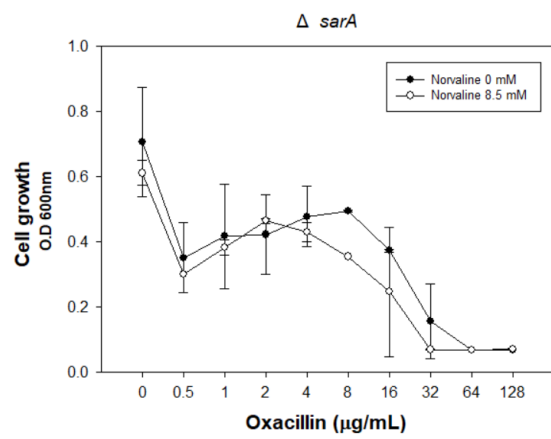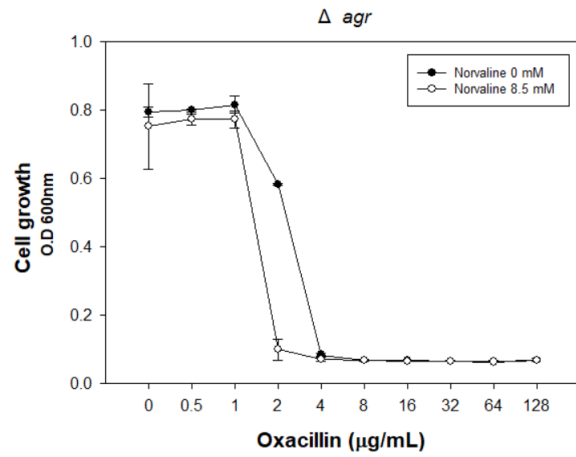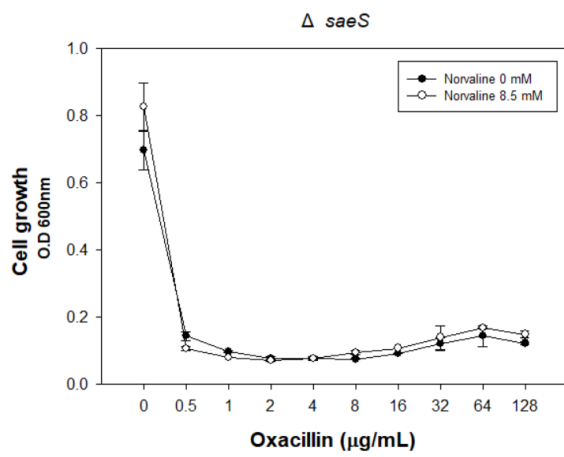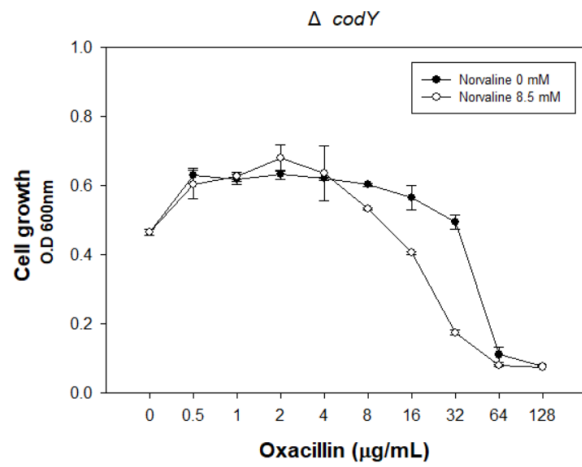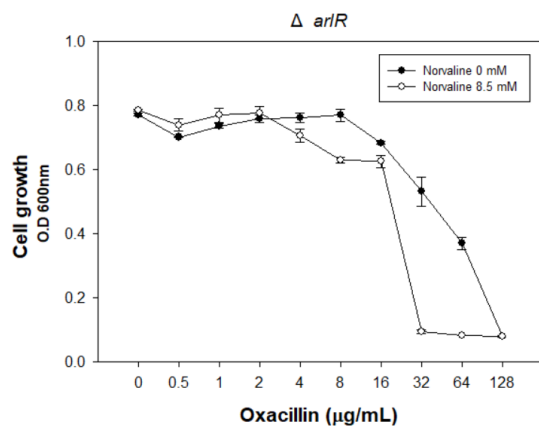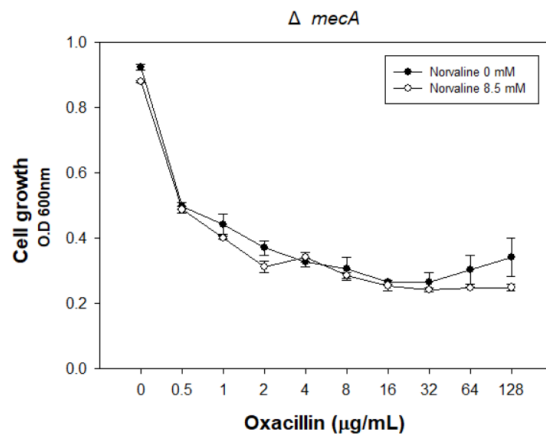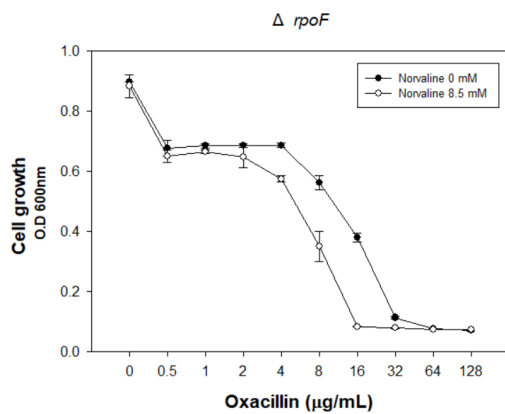

**Supplementary Figure S3.** Cell growth of MRSA deletion mutants ( $\Delta sarA$ ,  $\Delta agr$ ,  $\Delta saeS$ ,  $\Delta codY$ ,  $\Delta arlR$ ,  $\Delta mecA$ , and  $\Delta rpoF$ ) with and without D-norvaline treatment.
